# Supplementary material for: Integrin β1 Promotes Pancreatic Tumor Growth by Upregulating Kindlin-2 and TGF-β Receptor-2
Source: MDPI journal article supplement (doi:10.3390/ijms221910599), 2021-09-30
Supplement: s1 [file s1]

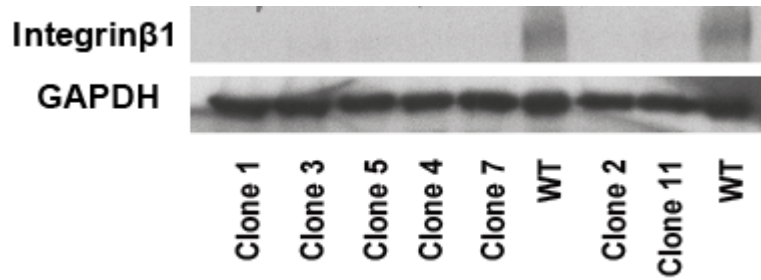

**Supplementary Figure S1: Selection of  $\beta 1$  knockout MIA PaCa-2 clones.** Clones were selected after shRNA treatment by puromycin selection. Selected clones were screened for the expression of integrin  $\beta 1$  by immunoblotting. WT MIA PaCa-2 samples were used to compare between the levels of expression.
